# Supplementary material for: Von Willebrand factor and ADAMTS13 activity in relation to risk of dementia: a population-based study
Source: PubMed Central journal article supplement (PMC5882924; doi:10.1038/s41598-018-23865-7), 2018-04-03
Supplement: 41598_2018_23865_MOESM1_ESM.pdf [file 41598_2018_23865_MOESM1_ESM.pdf]

**Supplementary material with the article**

**Von Willebrand factor and ADAMTS13 activity in relation to risk of dementia: a population-based study**

Frank J Wolters, Johan Boender, Paul S de Vries, Michelle A Sonneveld, Peter J Koudstaal, Moniek P de Maat, Oscar H Franco, M Kamran Ikram,

Frank W Leebeek, M Arfan Ikram

**Supplementary Figure S1.** Associations of Von Willebrand factor (VWF) and ADAMTS13 with risk of dementia for several subgroups of interest.

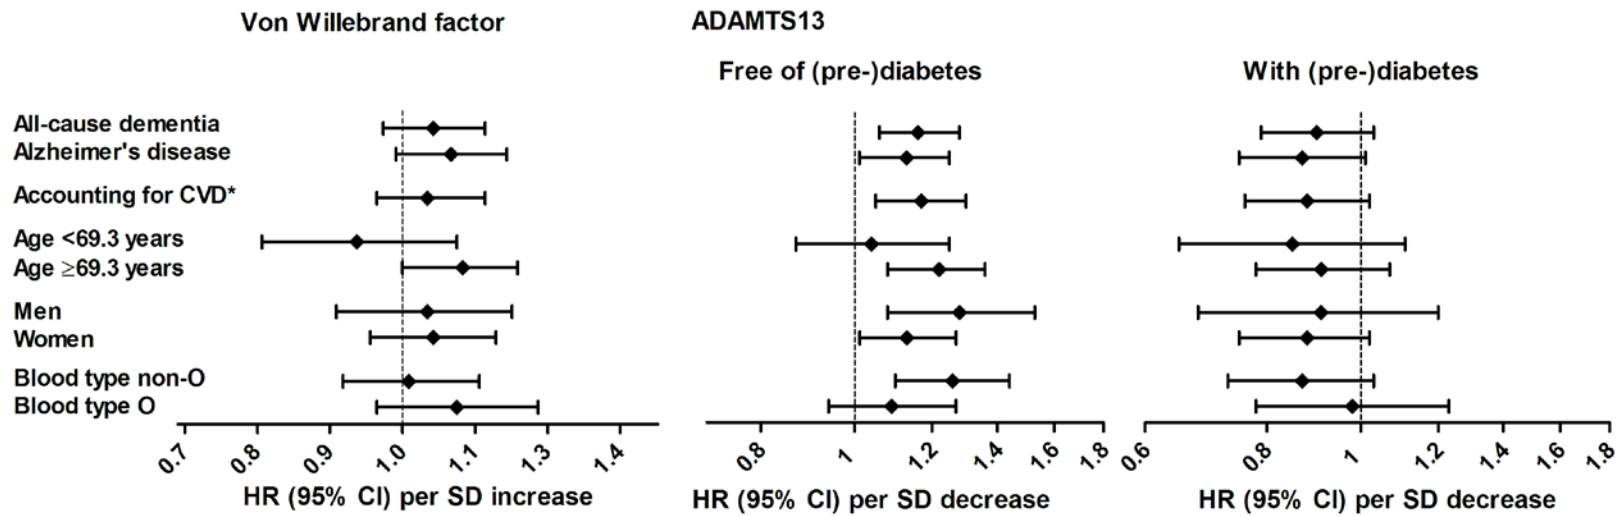

**Legend:** HR=hazard ratio from fully adjusted model; CI=confidence interval; SD=standard deviation  
Age stratification was done by the median age of the study population.

**Supplementary Table S1**

Von Willebrand factor (VWF) and ADAMTS13 at baseline in relation to the prevalence of Alzheimer's disease, and all-cause dementia excluding participants with cardiovascular disease at baseline.

|                             | Alzheimer's disease |                  |         | All-cause dementia<br>excluding cardiovascular disease |                  |         |
|-----------------------------|---------------------|------------------|---------|--------------------------------------------------------|------------------|---------|
|                             | No (n=5970)         | Yes (n=68)       | P-value | No (n=5674)                                            | Yes (n=72)       | P-value |
| <b>VWF:Ag</b>               |                     |                  |         |                                                        |                  |         |
| Geometric mean (95% CI)     | 1.22 (1.20-1.23)    | 1.31 (1.19-1.44) | 0.119   | 1.21 (1.20-1.22)                                       | 1.37 (1.25-1.50) | 0.011   |
| OR (95% CI) per SD increase | 1.22 (0.95-1.56)    |                  | 0.122   | 1.34 (1.06-1.69)                                       |                  | 0.016   |
| <b>ADAMTS13 activity</b>    |                     |                  |         |                                                        |                  |         |
| Mean (95% CI)               | 91.2 (90.7-91.6)    | 85.0 (80.9-89.0) | 0.003   | 91.2 (90.8-91.7)                                       | 86.0 (82.1-89.9) | 0.009   |
| OR (95% CI) per SD increase | 1.36 (1.03-1.78)    |                  | 0.029   | 1.30 (1.00-1.70)                                       |                  | 0.052   |
| <b>ADAMTS13:VWF ratio</b>   |                     |                  |         |                                                        |                  |         |
| Geometric mean (95% CI)     | 73.5 (72.6-74.3)    | 62.4 (56.1-69.5) | 0.003   | 73.8 (73.0-74.8)                                       | 61.1 (55.0-67.8) | 0.0004  |
| OR (95% CI) per SD decrease | 1.35 (1.06-1.72)    |                  | 0.016   | 1.43 (1.13-1.80)                                       |                  | 0.003   |

n=number of participants; se=standard error; SD=standard deviation; OR=odds ratio; CI=confidence interval;  
Model adjusted for age, sex, study subcohort

**Supplementary Table S2** Baseline levels of Von Willebrand factor antigen and risk of dementia, depicted per increasing year of follow-up

|                        | <b>All-cause dementia</b><br>n/N | <b>Odds ratio/ Hazard ratios (95% confidence interval)</b><br>Per standard deviation increase |
|------------------------|----------------------------------|-----------------------------------------------------------------------------------------------|
| <b>Cross-sectional</b> | 85/6055                          | 1.37 (1.06-1.77)                                                                              |
| <b>Longitudinal</b>    |                                  |                                                                                               |
| ≤2 years               | 61/5970                          | 1.32 (1.02-1.72)                                                                              |
| ≤3 years               | 111/5970                         | 1.21 (1.00-1.48)                                                                              |
| ≤4 years               | 125/5970                         | 1.15 (0.96-1.39)                                                                              |
| ≤5 years               | 204/5970                         | 1.07 (0.93-1.24)                                                                              |
| ≤6 years               | 263/5970                         | 1.08 (0.95-1.23)                                                                              |
| ≤7 years               | 322/5970                         | 1.06 (0.95-1.19)                                                                              |
| ≤8 years               | 360/5970                         | 1.08 (0.97-1.20)                                                                              |
| ≤9 years               | 399/5970                         | 1.05 (0.95-1.17)                                                                              |
| ≤10 years              | 455/5970                         | 1.07 (0.97-1.19)                                                                              |

n=number of dementia cases; N=sample at risk. Model adjusted for age, sex, study subcohort, smoking, systolic and diastolic blood pressure, antihypertensive medication, diabetes, serum cholesterol, high-density lipoprotein and triglycerides, lipid-lowering medication, creatinine, antithrombotic medication, fibrinogen, C-reactive protein, ABO blood type, and *APOE* genotype

Supplementary Table S3

Von Willebrand factor in relation to cognitive performance at baseline and during follow-up.

| Cognitive test                            | Cross-sectional         | Up till 2 <sup>nd</sup> examination | Up till 3 <sup>rd</sup> examination | Up till 4 <sup>th</sup> examination |
|-------------------------------------------|-------------------------|-------------------------------------|-------------------------------------|-------------------------------------|
|                                           |                         | (4.4 years)                         | (10.8 years)                        | (15.4 years)                        |
| <b>Letter-digit substitution – per SD</b> | -0.026 (-0.051;-0.003)  | -0.016 (-0.061;0.029)               | 0.012 (-0.016;0.039)                | -0.001 (-0.022;0.021)               |
| Q2 (vs. Q1)                               | -0.015 (-0.079; 0.048)  | -0.013 (-0.133 ;0.107)              | 0.017 (-0.054; 0.088)               | 0.017 (-0.037; 0.071)               |
| Q3 (vs. Q1)                               | -0.005 (-0.071; 0.061)  | 0.012 (-0.110; -0.134)              | 0.012 (-0.060; 0.084)               | -0.012 (-0.067; 0.044)              |
| Q4 (vs. Q1)                               | -0.081 (-0.151; -0.011) | -0.066 (-0.192; 0.060)              | 0.045 (-0.031; 0.122)               | 0.007 (-0.052; 0.066)               |
| <b>Verbal fluency – per SD</b>            | -0.050 (-0.076;-0.024)  | -0.037 (-0.096;0.022)               | 0.020 (-0.010;0.050)                | 0.006 (-0.017;0.029)                |
| Q2 (vs. Q1)                               | -0.061 (-0.127; 0.005)  | -0.032 (-0.190; 0.125)              | 0.003 (-0.075; 0.081)               | 0.022 (-0.036; 0.081)               |
| Q3 (vs. Q1)                               | -0.031 (-0.100; 0.037)  | -0.145 (-0.305; 0.016)              | -0.021 (-0.100; 0.059)              | -0.036 (-0.097; 0.024)              |
| Q4 (vs. Q1)                               | -0.157 (-0.230; -0.085) | -0.069 (-0.233; 0.096)              | 0.059 (-0.025; 0.143)               | 0.021 (-0.044; 0.086)               |
| <b>Stroop test – per SD</b>               | -0.031 (-0.057;-0.005)  | -0.049 (-0.110;0.012)               | -0.015 (-0.046;0.017)               | -0.027 (-0.053;-0.0004)             |
| Q2 (vs. Q1)                               | -0.028 (-0.094; 0.037)  | -0.024 (-0.185; 0.136)              | 0.032 (-0.050; 0.113)               | 0.008 (-0.059; 0.074)               |
| Q3 (vs. Q1)                               | -0.044 (-0.112; 0.024)  | -0.009 (-0.172; 0.154)              | 0.024 (-0.059; 0.107)               | -0.027 (-0.095; 0.041)              |
| Q4 (vs. Q1)                               | -0.103 (-0.175; -0.030) | -0.093 (-0.263; 0.076)              | -0.007 (-0.095; 0.081)              | -0.049 (-0.122; 0.023)              |
| <b>G-factor – per SD</b>                  | -0.047 (-0.072;-0.021)  | -0.057 (-0.103;-0.010)              | -0.005 (-0.030;0.019)               | -0.013 (-0.034;0.007)               |
| Q2 (vs. Q1)                               | -0.050 (-0.113; 0.014)  | -0.021 (-0.144; 0.103)              | 0.025 (-0.038; 0.089)               | 0.024 (-0.028; 0.075)               |
| Q3 (vs. Q1)                               | -0.039 (-0.105; 0.027)  | -0.089 (-0.214; 0.036)              | -0.001 (-0.066; 0.064)              | -0.033 (-0.086; 0.020)              |
| Q4 (vs. Q1)                               | -0.156 (-0.227; -0.086) | -0.123 (-0.252; 0.007)              | 0.004 (-0.065; 0.073)               | -0.024 (-0.081; 0.033)              |

SD=standard deviation. Results reflect the betas per standard deviation increase for baseline VWF and the VWF\*follow-up time interaction (expressed per 10 years follow-up) from a fully adjusted linear mixed model including all four examinations, and restricting analyses to the first two or three assessments, respectively. Lower scores reflect worse performance for all tests.

**Supplementary Table S4**

Baseline ADAMTS13 in relation to the risk of dementia in the overall population: comparison of model I with model II, and stratifying between pre-diabetes and diabetes at baseline

|                 | Overall study population        |                  | Free of (pre-)diabetes          |                  | Pre-diabetes                    |                  | Diabetes                        |                  |
|-----------------|---------------------------------|------------------|---------------------------------|------------------|---------------------------------|------------------|---------------------------------|------------------|
|                 | $n_{\text{dem}}/N_{\text{tot}}$ | HR (95% CI)      | $n_{\text{dem}}/N_{\text{tot}}$ | HR (95% CI)      | $n_{\text{dem}}/N_{\text{tot}}$ | HR (95% CI)      | $n_{\text{dem}}/N_{\text{tot}}$ | HR (95% CI)      |
| <b>Model I</b>  |                                 |                  |                                 |                  |                                 |                  |                                 |                  |
| Per quartile    |                                 |                  |                                 |                  |                                 |                  |                                 |                  |
| Q1 <80.6%       | 239/1492                        | 1.09 (0.89-1.33) | 190/1081                        | 1.38 (1.07-1.77) | 28/238                          | 0.57 (0.33-0.98) | 21/163                          | 0.77 (0.44-1.35) |
| Q2 80.6-91.2%   | 210/1493                        | 0.93 (0.76-1.14) | 158/1088                        | 1.10 (0.86-1.41) | 31/235                          | 0.67 (0.41-1.12) | 20/154                          | 0.75 (0.44-1.30) |
| Q3 91.2-101.9%  | 191/1493                        | 0.83 (0.67-1.02) | 133/1095                        | 0.90 (0.69-1.16) | 31/223                          | 0.77 (0.46-1.28) | 27/168                          | 0.79 (0.48-1.29) |
| Q4 >101.9%      | 181/1492                        | REFERENCE        | 106/995                         | REFERENCE        | 31/223                          | REFERENCE        | 43/259                          | REFERENCE        |
| Q1 versus Q2-4  |                                 | 1.19 (1.02-1.39) |                                 | 1.38 (1.15-1.65) |                                 | 0.73 (0.47-1.13) |                                 | 0.91 (0.56-1.49) |
| Per SD decrease | 821/5970                        | 1.04 (0.96-1.12) | 587/4259                        | 1.13 (1.03-1.24) | 121/919                         | 0.87 (0.73-1.04) | 111/744                         | 0.97 (0.81-1.16) |
| <b>Model II</b> |                                 |                  |                                 |                  |                                 |                  |                                 |                  |
| Per quartile    |                                 |                  |                                 |                  |                                 |                  |                                 |                  |
| Q1 <80.6%       | 239/1492                        | 1.16 (0.94-1.43) | 190/1081                        | 1.51 (1.16-1.95) | 28/238                          | 0.52 (0.29-0.91) | 21/163                          | 0.87 (0.48-1.55) |
| Q2 80.6-91.2%   | 210/1493                        | 1.00 (0.82-1.23) | 158/1088                        | 1.22 (0.94-1.57) | 31/235                          | 0.65 (0.38-1.11) | 20/154                          | 0.79 (0.44-1.41) |
| Q3 91.2-101.9%  | 191/1493                        | 0.85 (0.69-1.04) | 133/1095                        | 0.90 (0.69-1.17) | 31/223                          | 0.75 (0.44-1.26) | 27/168                          | 0.84 (0.50-1.41) |
| Q4 >101.9%      | 181/1492                        | REFERENCE        | 106/995                         | REFERENCE        | 31/223                          | REFERENCE        | 43/259                          | REFERENCE        |
| Q1 versus Q2-4  |                                 | 1.23 (1.05-1.44) |                                 | 1.44 (1.20-1.73) |                                 | 0.69 (0.44-1.07) |                                 | 0.98 (0.59-1.64) |
| Per SD decrease | 821/5970                        | 1.06 (0.98-1.15) | 587/4259                        | 1.16 (1.06-1.28) | 121/919                         | 0.83 (0.68-1.01) | 111/744                         | 1.04 (0.85-1.27) |

HR=hazard ratio; CI=confidence interval;  $n_{\text{dem}}$ =number of dementia cases and  $N_{\text{tot}}$ =number of individuals in group, presented for non-imputed data (missing diabetes status, n=48)

Model I: adjusted for age, sex, and study subcohort

Model II: as model I with additional adjustment for smoking, systolic and diastolic blood pressure, antihypertensive medication, serum cholesterol, HDL and triglycerides, lipid-lowering medication, body mass index, (pre-)diabetes (if applicable), creatinine, antithrombotic medication, CRP, fibrinogen, ABO blood type, and APOE genotype

Supplementary Table S5

Baseline ADAMTS13:VWF ratio and risk of dementia.

|                    |                                    | Overall analysis (n=5970) |                  | Free of (pre-)diabetes (n=4259) |                  | With (pre-)diabetes (n=1663) |                  |
|--------------------|------------------------------------|---------------------------|------------------|---------------------------------|------------------|------------------------------|------------------|
|                    |                                    | Model I                   | Model II         | Model I                         | Model II         | Model I                      | Model II         |
| ADAMTS13:VWF ratio | n <sub>dem</sub> /N <sub>tot</sub> | HR, 95% CI                | HR, 95% CI       | HR, 95% CI                      | HR, 95% CI       | HR, 95% CI                   | HR, 95% CI       |
| Per quartile       |                                    |                           |                  |                                 |                  |                              |                  |
| Q1                 | 239/1492                           | 1.12 (0.92-1.38)          | 1.20, 0.96-1.49  | 1.30 (1.01-1.66)                | 1.40 (1.10-1.82) | 0.80 (0.56-1.15)             | 0.81 (0.54-1.22) |
| Q2                 | 210/1493                           | 0.97 (0.79-1.19)          | 0.98, 0.79-1.21  | 1.08 (0.84-1.38)                | 1.07 (0.83-1.39) | 0.76 (0.53-1.10)             | 0.77 (0.52-1.13) |
| Q3                 | 191/1493                           | 1.16 (0.94-1.43)          | 1.21, 0.98-1.49  | 1.34 (1.05-1.72)                | 1.41 (1.10-1.82) | 0.79 (0.54-1.17)             | 0.82 (0.55-1.22) |
| Q4                 | 181/1492                           | REFERENCE                 | REFERENCE        | REFERENCE                       | REFERENCE        | REFERENCE                    | REFERENCE        |
| Per SD decrease    | 821/5970                           | 1.05 (0.98-1.13)          | 1.08 (1.00-1.17) | 1.08 (0.99-1.18)                | 1.11 (1.01-1.23) | 0.99 (0.86-1.13)             | 0.99 (0.86-1.17) |

Model adjusted for age, sex, study subcohort, smoking, systolic and diastolic blood pressure, antihypertensive medication, diabetes, serum cholesterol, HDL and triglycerides, lipid-lowering medication, body mass index, diabetes, creatinine, antithrombotic medication, CRP, fibrinogen, and *APOE* genotype

Supplementary Table S6

Quartiles of ADAMTS13 activity in relation to change in cognitive test scores during four consecutive rounds

| ADAMTS13                         | Free of (pre-)diabetes (n=4259) | Impaired fasting glucose (n=919) | Diabetes (n=744)       |
|----------------------------------|---------------------------------|----------------------------------|------------------------|
|                                  | $\beta$ , 95% CI                | $\beta$ , 95% CI                 | $\beta$ , 95% CI       |
| <b>G-factor</b>                  |                                 |                                  |                        |
| Q1                               | -0.051 (-0.117; 0.015)          | -0.088 (-0.233; 0.057)           | 0.046 (-0.147; 0.238)  |
| Q2                               | 0.006 (-0.054; 0.066)           | -0.021 (-0.155; 0.114)           | 0.002 (-0.190; 0.194)  |
| Q3                               | 0.009 (-0.049; 0.067)           | 0.057 (-0.079; 0.193)            | -0.015 (-0.189; 0.158) |
| Q4                               | REFERENCE                       | REFERENCE                        | REFERENCE              |
| Q1 versus Q2-4                   | -0.056 (-0.113; 0.001)          | -0.098 (-0.223; 0.026)           | 0.050 (-0.122; 0.222)  |
| <b>Letter-digit substitution</b> |                                 |                                  |                        |
| Q1                               | -0.044 (-0.114; 0.025)          | 0.001 (-0.144; 0.147)            | 0.078 (-0.118; 0.275)  |
| Q2                               | 0.005 (-0.059; 0.068)           | -0.007 (-0.143; 0.129)           | -0.075 (-0.272; 0.123) |
| Q3                               | -0.001 (-0.063; 0.060)          | 0.128 (-0.010; 0.265)            | -0.049 (-0.228; 0.131) |
| Q4                               | REFERENCE                       | REFERENCE                        | REFERENCE              |
| Q1 versus Q2-4                   | -0.046 (-0.106; 0.014)          | -0.036 (-0.160; 0.088)           | 0.113 (-0.063; 0.288)  |
| <b>Verbal fluency</b>            |                                 |                                  |                        |
| Q1                               | -0.014 (-0.089; 0.062)          | -0.073 (-0.254; 0.108)           | 0.001 (-0.195; 0.197)  |
| Q2                               | 0.059 (-0.010; 0.127)           | 0.016 (-0.151; 0.183)            | -0.020 (-0.213; 0.174) |
| Q3                               | 0.005 (-0.062; 0.071)           | 0.161 (-0.007; 0.329)            | 0.037 (-0.143; 0.216)  |
| Q4                               | REFERENCE                       | REFERENCE                        | REFERENCE              |
| Q1 versus Q2-4                   | -0.034 (-0.099; 0.031)          | -0.129 (-0.284; 0.026)           | -0.007 (-0.181; 0.167) |
| <b>Stroop test</b>               |                                 |                                  |                        |
| Q1                               | -0.060 (-0.141; 0.021)          | -0.252 (-0.476; -0.028)          | 0.100 (-0.164; 0.363)  |
| Q2                               | -0.009 (-0.083; 0.064)          | -0.130 (-0.340; 0.080)           | 0.047 (-0.216; 0.310)  |
| Q3                               | 0.004 (-0.067; 0.075)           | -0.118 (-0.329; 0.092)           | -0.065 (-0.306; 0.177) |
| Q4                               | REFERENCE                       | REFERENCE                        | REFERENCE              |
| Q1 versus Q2-4                   | -0.059 (-0.129; 0.011)          | -0.170 (-0.359; 0.019)           | 0.108 (-0.127; 0.343)  |

Model adjusted for age, sex, study subcohort, smoking, systolic and diastolic blood pressure, antihypertensive medication, serum cholesterol, HDL and triglycerides, lipid-lowering medication, body mass index, creatinine, antithrombotic medication, CRP, fibrinogen, ABO blood type, and *APOE* genotype.

Estimates represent change in cognitive performance per 10 years of follow-up, relative to the highest quartile(s).



**Supplementary Table S7**

ADAMTS13:VWF ratio and change in cognitive test scores during the 15-year follow-up period.

|                                  | $\beta$ , 95% CI        |
|----------------------------------|-------------------------|
| <b>G-factor</b>                  |                         |
| Q1                               | -0.084 (-0.142; -0.026) |
| Q2                               | 0.003 (-0.050; 0.056)   |
| Q3                               | -0.005 (-0.055; 0.045)  |
| Q4                               | REFERENCE               |
| <b>Letter-digit substitution</b> |                         |
| Q1                               | -0.013 (-0.074; 0.048)  |
| Q2                               | -0.004 (-0.060; 0.051)  |
| Q3                               | -0.003 (-0.056; 0.050)  |
| Q4                               | REFERENCE               |
| <b>Verbal fluency</b>            |                         |
| Q1                               | -0.009 (-0.076; 0.058)  |
| Q2                               | 0.003 (-0.058; 0.064)   |
| Q3                               | -0.025 (-0.083; 0.033)  |
| Q4                               | REFERENCE               |
| <b>Stroop test</b>               |                         |
| Q1                               | -0.113 (-0.188; -0.038) |
| Q2                               | 0.012 (-0.056; 0.080)   |
| Q3                               | 0.033 (-0.032; 0.098)   |
| Q4                               | REFERENCE               |

Model adjusted for age, sex, study subcohort, smoking, systolic and diastolic blood pressure, antihypertensive medication, serum cholesterol, HDL and triglycerides, lipid-lowering medication, BMI, diabetes, creatinine, antithrombotic medication, CRP, fibrinogen, ABO blood type, and *APOE* genotype. Estimates represent change in cognitive performance per 10 years of follow-up, relative to the highest quartile.

**Supplementary Table S8**

ADAMTS13 activity and cognitive change, excluding participants who developed dementia during follow-up

|                                  | Overall population (n=5970)<br>β, 95% CI | Excluding incident dementia (n=5149)<br>β, 95% CI |
|----------------------------------|------------------------------------------|---------------------------------------------------|
| <b>G-factor</b>                  |                                          |                                                   |
| Q1                               | -0.044 (-0.102; 0.014)                   | -0.055 (-0.107; -0.003)                           |
| Q2                               | 0.009 (-0.044; 0.061)                    | -0.002 (-0.050; 0.046)                            |
| Q3                               | 0.020 (-0.031; 0.071)                    | 0.017 (-0.029; 0.063)                             |
| Q4                               | REFERENCE                                | REFERENCE                                         |
| Q1 versus Q2-4                   | -0.053 (-0.103; -0.004)                  | -0.061 (-0.106; -0.015)                           |
| <b>Letter-digit substitution</b> |                                          |                                                   |
| Q1                               | -0.021 (-0.081; 0.039)                   | -0.030 (-0.076; 0.017)                            |
| Q2                               | -0.0002 (-0.056; 0.055)                  | -0.034 (-0.077; 0.009)                            |
| Q3                               | 0.016 (-0.037; 0.070)                    | 0.002 (-0.039; 0.044)                             |
| Q4                               | REFERENCE                                | REFERENCE                                         |
| Q1 versus Q2-4                   | -0.027 (-0.079; 0.025)                   | -0.020 (-0.060; 0.020)                            |
| <b>Verbal fluency</b>            |                                          |                                                   |
| Q1                               | -0.019 (-0.084; 0.047)                   | -0.036 (-0.099; 0.027)                            |
| Q2                               | 0.052 (-0.008; 0.113)                    | 0.046 (-0.012; 0.103)                             |
| Q3                               | 0.034 (-0.025; 0.092)                    | 0.010 (-0.046; 0.066)                             |
| Q4                               | REFERENCE                                | REFERENCE                                         |
| Q1 versus Q2-4                   | -0.047 (-0.104; 0.010)                   | -0.054 (-0.108; 0.001)                            |
| <b>Stroop test</b>               |                                          |                                                   |
| Q1                               | -0.074 (-0.148; 0.0001)                  | -0.071 (-0.137; -0.006)                           |
| Q2                               | -0.019 (-0.087; 0.050)                   | -0.028 (-0.089; 0.033)                            |
| Q3                               | -0.012 (-0.078; 0.054)                   | 0.007 (-0.051; 0.065)                             |
| Q4                               | REFERENCE                                | REFERENCE                                         |
| Q1 versus Q2-4                   | -0.064 (-0.128; -0.0002)                 | -0.065 (-0.122; -0.008)                           |

Model adjusted for age, sex, study subcohort, smoking, systolic and diastolic blood pressure, antihypertensive medication, serum cholesterol, HDL and triglycerides, lipid-lowering medication, BMI, diabetes, creatinine, antithrombotic medication, CRP, fibrinogen, ABO blood type, and *APOE* genotype.
